# Supplementary material
Source: Springer Nature journal article supplement (https://www.springermedizin.de/resource/supplementary/13643_2013_178_MOESM6_ESM.pdf/9681450)

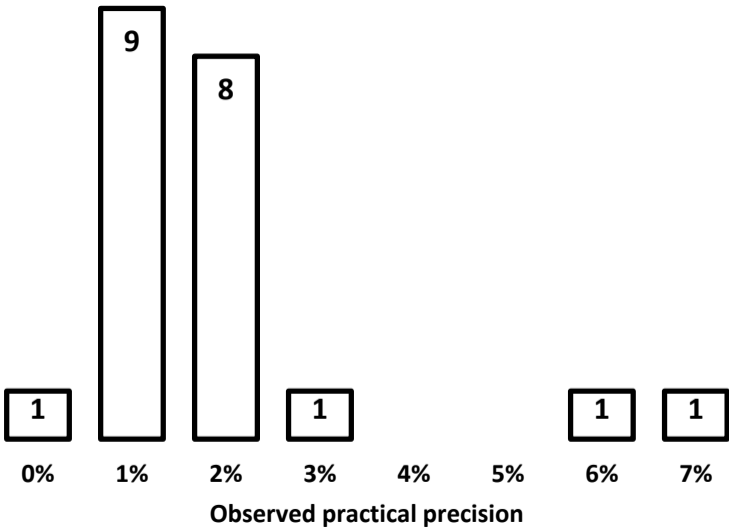

Supplement: MOESM6 [file 9681450]
